# Supplementary material
Source: MDPI journal article supplement (https://www.mdpi.com/2075-163X/13/2/207)
Supplement: s1 [file s1]

## Electronic Supplementary Materials

### Sample preparation:

The  $(\text{Mg}_{0.37}\text{Mn}_{0.32}\text{Fe}_{0.31})\text{CO}_3$ ,  $(\text{Fe}_{0.51}\text{Mg}_{0.49})\text{CO}_3$ ,  $(\text{Mn}_{0.53}\text{Fe}_{0.47})\text{CO}_3$ ,  $(\text{Mg}_{0.50}\text{Mn}_{0.50})\text{CO}_3$ ,  $\text{FeCO}_3$ ,  $\text{MgCO}_3$  and  $\text{MnCO}_3$  single crystals were prepared by high  $P$ - $T$  annealing as reported by Liang *et al.* (2018a). The high  $P$ - $T$  reactions were performed on a DS 6×600t cubic-anvil-type apparatus using  $h$ -BN pressure medium and a graphite heater.  $\text{MgO}$  (99.99%, Alfa Aesar),  $\text{Fe}_2\text{O}_3$  (99.99%, Alfa Aesar),  $\text{MnCO}_3$  (99.99%, Alfa Aesar), and anhydrous  $\text{H}_2\text{C}_2\text{O}_4$  (98%, Alfa Aesar) were used as starting materials to participate in the annealing reaction:

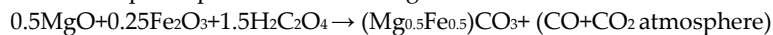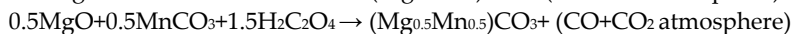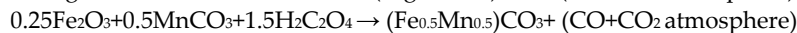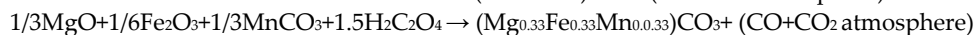

The annealing reaction with a fully sealed platinum capsule was carried out in the aquatic medium under 3 GPa and 700 °C for 48 h. After the high  $P$ - $T$  experiment, the quenched sample was removed from the platinum capsule, and the single crystals were optically examined under a plane polarized microscope.

(a)

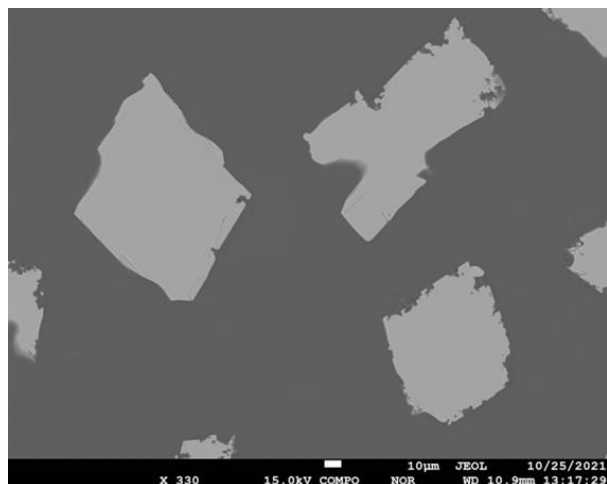

(b)

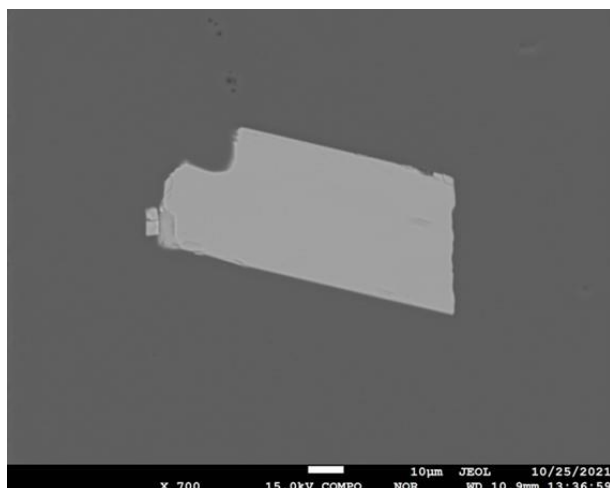

(c)

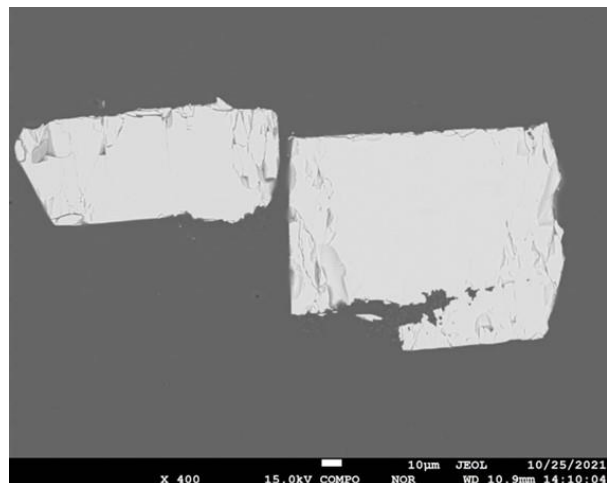

(d)

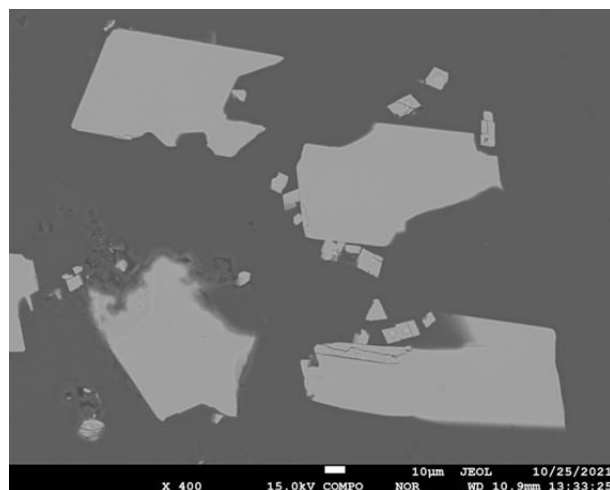

**Supplementary Figure S1.** The backscattered electronic (BSE) image of single crystal thin sections of (a)  $(\text{Mg}_{0.37}\text{Mn}_{0.32}\text{Fe}_{0.31})\text{CO}_3$ , (b)  $(\text{Fe}_{0.51}\text{Mg}_{0.49})\text{CO}_3$ , (c)  $(\text{Mn}_{0.53}\text{Fe}_{0.47})\text{CO}_3$ , and (d)  $(\text{Mg}_{0.50}\text{Mn}_{0.50})\text{CO}_3$  in which the red circles are the detection position of electron probing.

The observed vibrational bands of magnesite  $\text{MgCO}_3$ , siderite  $\text{FeCO}_3$  and rhodochrosite  $\text{MnCO}_3$  at 300 K were compared with their documented values in Table 1. The positions of the observed Raman bands of magnesite  $\text{MgCO}_3$  at ambient temperature are similar to those reported by Farsang *et al.*, (2018) and Gillet *et al.*, (1993), however, the positions of the observed Raman bands of siderite  $\text{FeCO}_3$  and rhodochrosite  $\text{MnCO}_3$  are slightly smaller (1-3  $\text{cm}^{-1}$  shift) than those reported by Wang *et al.*, (2022) and Farsang *et al.*, (2018). The minor shift in positions may be attributed to deviations from the stoichiometry, the effect of natural impurities or the presence of point defects. Among all samples, magnesite  $\text{MgCO}_3$  with the smallest ion radii has the highest Raman wavenumbers.

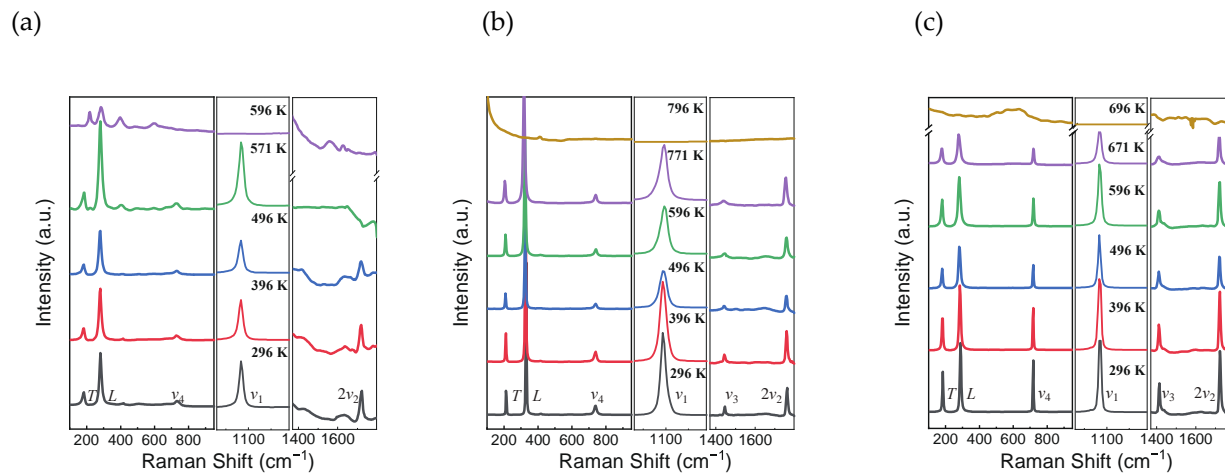

**Supplementary Figure S2.** Representative Raman spectra of (a)  $\text{FeCO}_3$ , (b)  $\text{MgCO}_3$  and (c)  $\text{MnCO}_3$  at high temperature. The asterisks (\*) symbolize the unassigned Raman peaks.

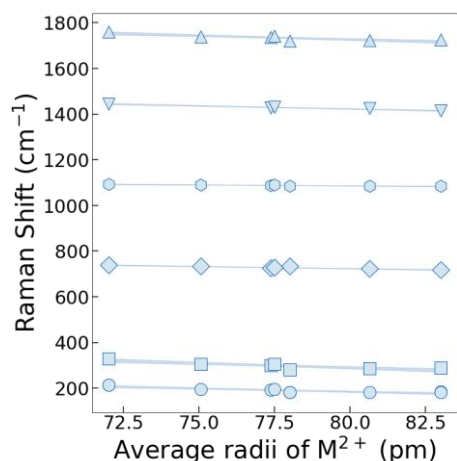

**Supplementary Figure S3.** Raman shifts of  $(\text{Mg}_{0.37}\text{Mn}_{0.32}\text{Fe}_{0.31})\text{CO}_3$ ,  $(\text{Fe}_{0.51}\text{Mg}_{0.49})\text{CO}_3$ ,  $(\text{Mn}_{0.53}\text{Fe}_{0.47})\text{CO}_3$ ,  $(\text{Mg}_{0.50}\text{Mn}_{0.50})\text{CO}_3$ ,  $\text{FeCO}_3$ ,  $\text{MgCO}_3$  and  $\text{MnCO}_3$  of each mode with the change of average ion radii.

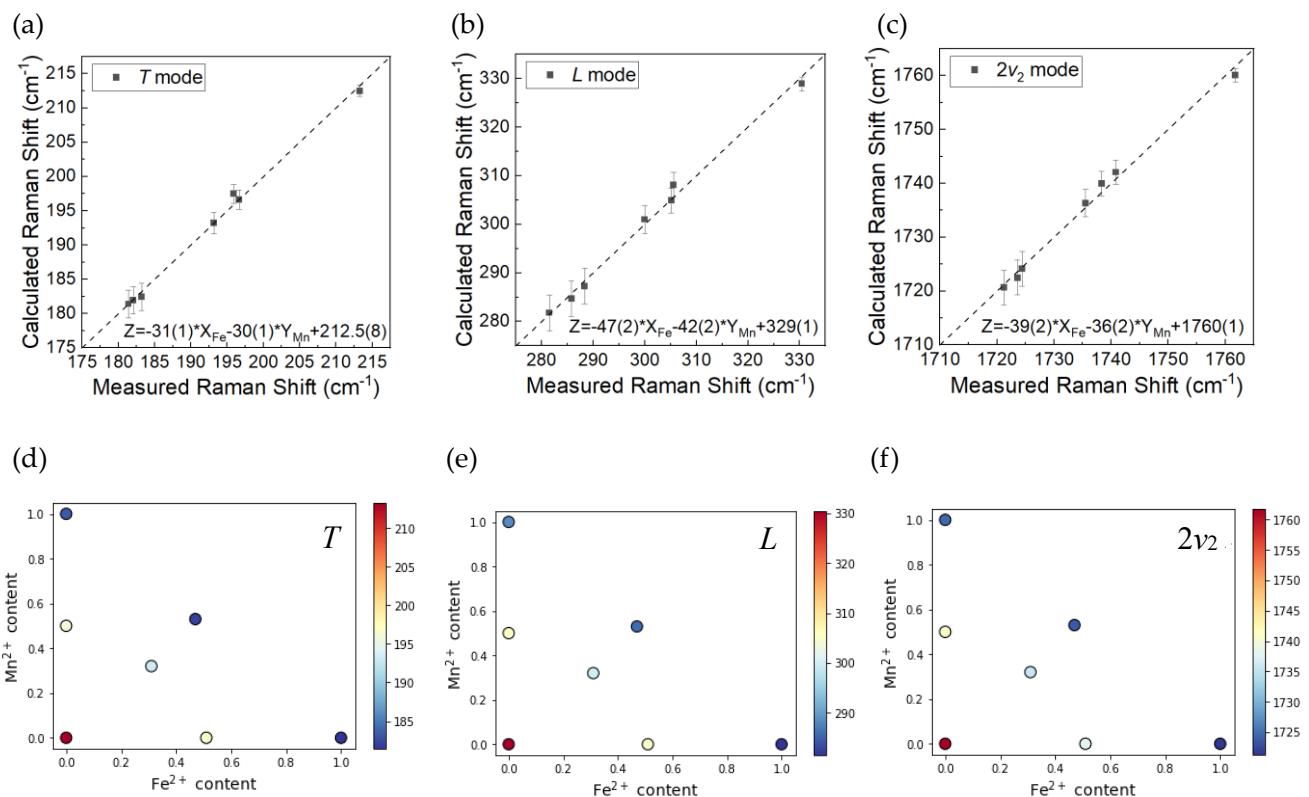

**Supplementary Figure S4.** The relationship between content of iron and manganese and the Raman shift of mode (a) *T*, (b) *L* and (c) *2v<sub>2</sub>* and the thermal diagram of iron and manganese on the Raman shift of mode (d) *T*, (e) *L* and (f) *2v<sub>2</sub>* at 300K.

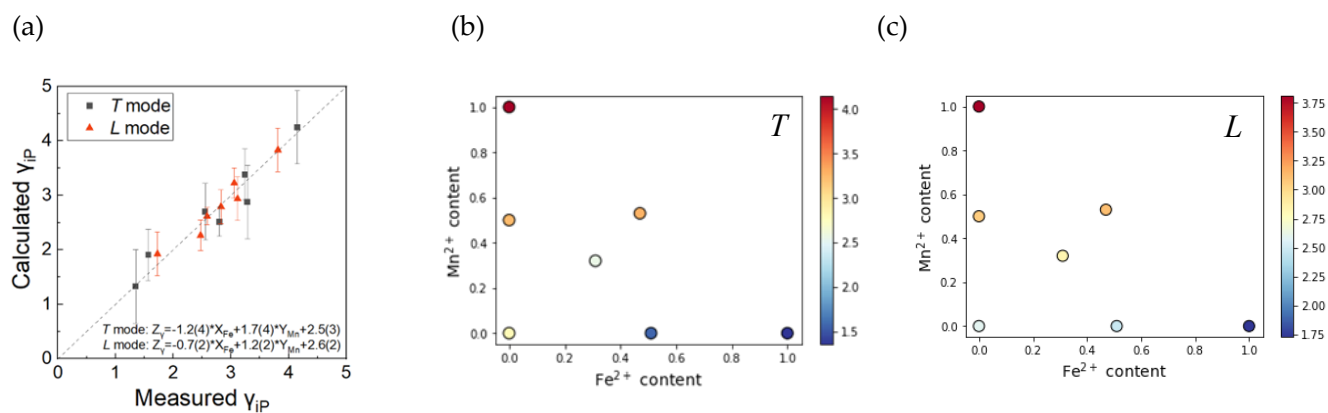

**Supplementary Figure S5.** (a) The relationship between content of iron and manganese and the mode Grüneisen parameters of mode *T* and *L*. The effect of iron and manganese on the mode Grüneisen parameters of mode (b) *T* and (c) *L*.

**Supplementary Table S1.** Results of electron probe analysis of single crystal thin sections of Mg-Fe-Mn carbonates.

|          | Oxides Mass (%) | MgO           | MnO           | FeO           | Composition                                                              |
|----------|-----------------|---------------|---------------|---------------|--------------------------------------------------------------------------|
| Sample 1 | Position 1      | 14.551        | 22.158        | 21.581        | Mg <sub>0.37</sub> Mn <sub>0.32</sub> Fe <sub>0.31</sub> CO <sub>3</sub> |
|          | Position 2      | 15.378        | 22.654        | 21.251        | Mg <sub>0.38</sub> Mn <sub>0.32</sub> Fe <sub>0.30</sub> CO <sub>3</sub> |
|          | Position 3      | 15.003        | 23.098        | 20.980        | Mg <sub>0.38</sub> Mn <sub>0.32</sub> Fe <sub>0.30</sub> CO <sub>3</sub> |
|          | Position 4      | 14.330        | 22.970        | 22.476        | Mg <sub>0.38</sub> Mn <sub>0.32</sub> Fe <sub>0.30</sub> CO <sub>3</sub> |
|          | Position 5      | 14.478        | 22.647        | 22.749        | Mg <sub>0.36</sub> Mn <sub>0.33</sub> Fe <sub>0.31</sub> CO <sub>3</sub> |
|          | Position 6      | 14.442        | 22.029        | 22.729        | Mg <sub>0.36</sub> Mn <sub>0.32</sub> Fe <sub>0.32</sub> CO <sub>3</sub> |
|          | Position 7      | 14.350        | 22.282        | 22.224        | Mg <sub>0.36</sub> Mn <sub>0.32</sub> Fe <sub>0.32</sub> CO <sub>3</sub> |
|          | Position 8      | 14.363        | 22.585        | 21.453        | Mg <sub>0.36</sub> Mn <sub>0.33</sub> Fe <sub>0.31</sub> CO <sub>3</sub> |
|          | Position 9      | 14.033        | 22.859        | 22.336        | Mg <sub>0.35</sub> Mn <sub>0.33</sub> Fe <sub>0.32</sub> CO <sub>3</sub> |
|          | Position 10     | 14.629        | 22.373        | 21.969        | Mg <sub>0.37</sub> Mn <sub>0.32</sub> Fe <sub>0.31</sub> CO <sub>3</sub> |
|          | Average         | <b>14.556</b> | <b>22.566</b> | <b>21.975</b> | <b>Mg<sub>0.37</sub>Mn<sub>0.32</sub>Fe<sub>0.31</sub>CO<sub>3</sub></b> |
| Sample 2 | Position 1      | 19.457        | -             | 37.075        | Fe <sub>0.52</sub> Mg <sub>0.48</sub> CO <sub>3</sub>                    |
|          | Position 2      | 20.452        | -             | 37.556        | Fe <sub>0.51</sub> Mg <sub>0.49</sub> CO <sub>3</sub>                    |
|          | Position 3      | 20.008        | -             | 37.207        | Fe <sub>0.51</sub> Mg <sub>0.49</sub> CO <sub>3</sub>                    |
|          | Position 4      | 20.315        | -             | 37.870        | Fe <sub>0.51</sub> Mg <sub>0.49</sub> CO <sub>3</sub>                    |
|          | Position 5      | 20.435        | -             | 37.786        | Fe <sub>0.51</sub> Mg <sub>0.49</sub> CO <sub>3</sub>                    |
|          | Position 6      | 20.558        | -             | 37.826        | Fe <sub>0.51</sub> Mg <sub>0.49</sub> CO <sub>3</sub>                    |
|          | Position 7      | 20.963        | -             | 37.493        | Fe <sub>0.50</sub> Mg <sub>0.50</sub> CO <sub>3</sub>                    |
|          | Position 8      | 20.231        | -             | 38.206        | Fe <sub>0.51</sub> Mg <sub>0.49</sub> CO <sub>3</sub>                    |
|          | Position 9      | 20.806        | -             | 37.791        | Fe <sub>0.50</sub> Mg <sub>0.50</sub> CO <sub>3</sub>                    |
|          | Position 10     | 20.526        | -             | 37.573        | Fe <sub>0.51</sub> Mg <sub>0.49</sub> CO <sub>3</sub>                    |
|          | Position 11     | 20.571        | -             | 37.511        | Fe <sub>0.51</sub> Mg <sub>0.49</sub> CO <sub>3</sub>                    |
|          | Position 12     | 20.849        | -             | 37.969        | Fe <sub>0.51</sub> Mg <sub>0.49</sub> CO <sub>3</sub>                    |
|          | Position 13     | 20.659        | -             | 37.538        | Fe <sub>0.50</sub> Mg <sub>0.50</sub> CO <sub>3</sub>                    |
|          | Position 14     | 20.538        | -             | 37.677        | Fe <sub>0.51</sub> Mg <sub>0.49</sub> CO <sub>3</sub>                    |
|          | Position 15     | 20.501        | -             | 37.164        | Fe <sub>0.50</sub> Mg <sub>0.50</sub> CO <sub>3</sub>                    |
|          | Average         | <b>20.458</b> | -             | <b>37.616</b> | <b>Fe<sub>0.51</sub>Mg<sub>0.49</sub>CO<sub>3</sub></b>                  |
| Sample 3 | Position 1      | -             | 33.923        | 28.158        | Mn <sub>0.54</sub> Fe <sub>0.46</sub> CO <sub>3</sub>                    |
|          | Position 2      | -             | 33.355        | 29.822        | Mn <sub>0.53</sub> Fe <sub>0.47</sub> CO <sub>3</sub>                    |
|          | Position 3      | -             | 33.151        | 28.459        | Mn <sub>0.54</sub> Fe <sub>0.46</sub> CO <sub>3</sub>                    |
|          | Position 4      | -             | 32.689        | 29.373        | Mn <sub>0.53</sub> Fe <sub>0.47</sub> CO <sub>3</sub>                    |
|          | Position 5      | -             | 33.468        | 29.359        | Mn <sub>0.54</sub> Fe <sub>0.46</sub> CO <sub>3</sub>                    |
|          | Position 6      | -             | 33.507        | 29.581        | Mn <sub>0.53</sub> Fe <sub>0.47</sub> CO <sub>3</sub>                    |
|          | Position 7      | -             | 33.753        | 29.022        | Mn <sub>0.54</sub> Fe <sub>0.46</sub> CO <sub>3</sub>                    |
|          | Position 8      | -             | 33.434        | 29.686        | Mn <sub>0.53</sub> Fe <sub>0.47</sub> CO <sub>3</sub>                    |
|          | Position 9      | -             | 32.384        | 29.612        | Mn <sub>0.53</sub> Fe <sub>0.47</sub> CO <sub>3</sub>                    |
|          | Position 10     | -             | 33.007        | 29.312        | Mn <sub>0.53</sub> Fe <sub>0.47</sub> CO <sub>3</sub>                    |
|          | Average         | -             | <b>33.267</b> | <b>29.238</b> | <b>Mn<sub>0.53</sub>Fe<sub>0.47</sub>CO<sub>3</sub></b>                  |

|          |             |               |               |   |                                                         |
|----------|-------------|---------------|---------------|---|---------------------------------------------------------|
|          | Position 1  | 19.727        | 36.951        | - | Mg <sub>0.48</sub> Mn <sub>0.52</sub> CO <sub>3</sub>   |
|          | Position 2  | 19.838        | 36.535        | - | Mg <sub>0.49</sub> Mn <sub>0.51</sub> CO <sub>3</sub>   |
|          | Position 3  | 21.962        | 34.084        | - | Mg <sub>0.53</sub> Mn <sub>0.47</sub> CO <sub>3</sub>   |
|          | Position 4  | 21.225        | 35.581        | - | Mg <sub>0.51</sub> Mn <sub>0.49</sub> CO <sub>3</sub>   |
|          | Position 5  | 20.319        | 36.348        | - | Mg <sub>0.50</sub> Mn <sub>0.50</sub> CO <sub>3</sub>   |
| Sample 4 | Position 6  | 19.756        | 37.914        | - | Mg <sub>0.52</sub> Mg <sub>0.48</sub> CO <sub>3</sub>   |
|          | Position 7  | 20.618        | 36.749        | - | Mg <sub>0.50</sub> Mn <sub>0.50</sub> CO <sub>3</sub>   |
|          | Position 8  | 19.264        | 37.475        | - | Mg <sub>0.52</sub> Mg <sub>0.48</sub> CO <sub>3</sub>   |
|          | Position 9  | 22.415        | 34.038        | - | Mg <sub>0.47</sub> Mn <sub>0.53</sub> CO <sub>3</sub>   |
|          | Position 10 | 22.349        | 34.368        | - | Mg <sub>0.47</sub> Mn <sub>0.53</sub> CO <sub>3</sub>   |
|          | Average     | <b>20.899</b> | <b>35.805</b> | - | <b>Mg<sub>0.50</sub>Mn<sub>0.50</sub>CO<sub>3</sub></b> |

**Supplementary Table S2.** Single-crystal XRD parameters of (Mg<sub>0.37</sub>Mn<sub>0.32</sub>Fe<sub>0.31</sub>)CO<sub>3</sub>, (Fe<sub>0.51</sub>Mg<sub>0.49</sub>)CO<sub>3</sub>, (Mn<sub>0.53</sub>Fe<sub>0.47</sub>)CO<sub>3</sub> and (Mg<sub>0.50</sub>Mn<sub>0.50</sub>)CO<sub>3</sub> at varied temperatures.

|                                                                           | T (K) | a (Å)     | c (Å)       | V (Å <sup>3</sup> ) | M-O (Å)   | C-O (Å)    | O-M-O (Å)  | V <sub>MO6</sub> (Å <sup>3</sup> ) |
|---------------------------------------------------------------------------|-------|-----------|-------------|---------------------|-----------|------------|------------|------------------------------------|
| Mg <sub>0.37</sub> Mn <sub>0.32</sub> Fe <sub>0.31</sub> -CO <sub>3</sub> | 100   | 4.6951(2) | 15.3111(18) | 292.3(4)            | 2.1429(7) | 1.2860(14) | 88.18(2)   | 13.11(7)                           |
|                                                                           | 200   | 4.6982(2) | 15.3402(11) | 293.24(3)           | 2.1455(6) | 1.286(13)  | 88.135(19) | 13.15(7)                           |
|                                                                           | 300   | 4.7015(2) | 15.3673(9)  | 294.17(2)           | 2.1484(7) | 1.2860(15) | 88.11(2)   | 13.21(8)                           |
|                                                                           | 400   | 4.7041(2) | 15.3993(8)  | 295.11(2)           | 2.1514(7) | 1.2854(14) | 88.068(19) | 13.26(8)                           |
|                                                                           | 500   | 4.7067(2) | 15.4217(9)  | 295.87(2)           | 2.1539(6) | 1.2850(12) | 88.050(17) | 13.31(7)                           |
| Fe <sub>0.51</sub> Mg <sub>0.49</sub> CO <sub>3</sub>                     | 100   | 4.6566(2) | 15.142(14)  | 284.35(3)           | 2.1178(6) | 1.2863(12) | 88.136(17) | 12.65(7)                           |
|                                                                           | 200   | 4.6592(2) | 15.1681(13) | 285.16(3)           | 2.1209(5) | 1.2850(10) | 88.118(15) | 12.71(6)                           |
|                                                                           | 300   | 4.6621(2) | 15.1925(13) | 285.97(3)           | 2.1237(5) | 1.2841(10) | 88.103(15) | 12.76(6)                           |
|                                                                           | 400   | 4.6652(2) | 15.2236(14) | 286.94(3)           | 2.1267(6) | 1.2840(12) | 88.064(18) | 12.81(7)                           |
|                                                                           | 500   | 4.6678(2) | 15.2559(13) | 287.87(3)           | 2.1299(6) | 1.2829(11) | 88.026(16) | 12.87(7)                           |
| Mn <sub>0.53</sub> Fe <sub>0.47</sub> CO <sub>3</sub>                     | 100   | 4.7382(2) | 15.4920(10) | 301.21(3)           | 2.1703(9) | 1.2863(17) | 88.23(2)   | 13.62(9)                           |
|                                                                           | 200   | 4.7408(2) | 15.5193(10) | 302.07(3)           | 2.1731(8) | 1.2855(16) | 88.21(2)   | 13.67(8)                           |
|                                                                           | 300   | 4.7431(2) | 15.5545(9)  | 303.05(3)           | 2.1766(8) | 1.2840(17) | 88.17(2)   | 13.73(8)                           |
|                                                                           | 400   | 4.7458(2) | 15.5661(8)  | 303.62(2)           | 2.1789(8) | 1.2830(16) | 88.18(2)   | 13.78(8)                           |
|                                                                           | 500   | 4.7481(2) | 15.5938(9)  | 304.45(3)           | 2.1818(8) | 1.2820(16) | 88.16(2)   | 13.83(8)                           |
| Mg <sub>0.50</sub> Mn <sub>0.50</sub> CO <sub>3</sub>                     | 100   | 4.6991(2) | 15.2948(10) | 292.49(3)           | 2.1439(5) | 1.2858(10) | 88.270(14) | 13.13(6)                           |
|                                                                           | 200   | 4.7011(2) | 15.3244(10) | 293.30(3)           | 2.1464(5) | 1.2855(10) | 88.223(15) | 13.17(6)                           |
|                                                                           | 300   | 4.7038(2) | 15.3526(10) | 294.18(3)           | 2.1489(5) | 1.2855(11) | 88.183(15) | 13.22(6)                           |
|                                                                           | 400   | 4.7065(2) | 15.3881(11) | 295.20(3)           | 2.1525(6) | 1.2843(12) | 88.142(17) | 13.28(7)                           |
|                                                                           | 500   | 4.7090(2) | 15.4088(10) | 295.91(3)           | 2.1548(5) | 1.2837(11) | 88.128(15) | 13.33(6)                           |
